# Supplementary material for: ZIF-8 pyrolized N-doped carbon-supported iron catalysts for enhanced CO2 hydrogenation activity to valuable hydrocarbons
Source: Royal Society of Chemistry journal article supplement (doi:10.1039/d4cy00810c), 2024-01-01
Supplement: d4cy00810c1.pdf [file d4cy00810c1.pdf]

## Supporting Information

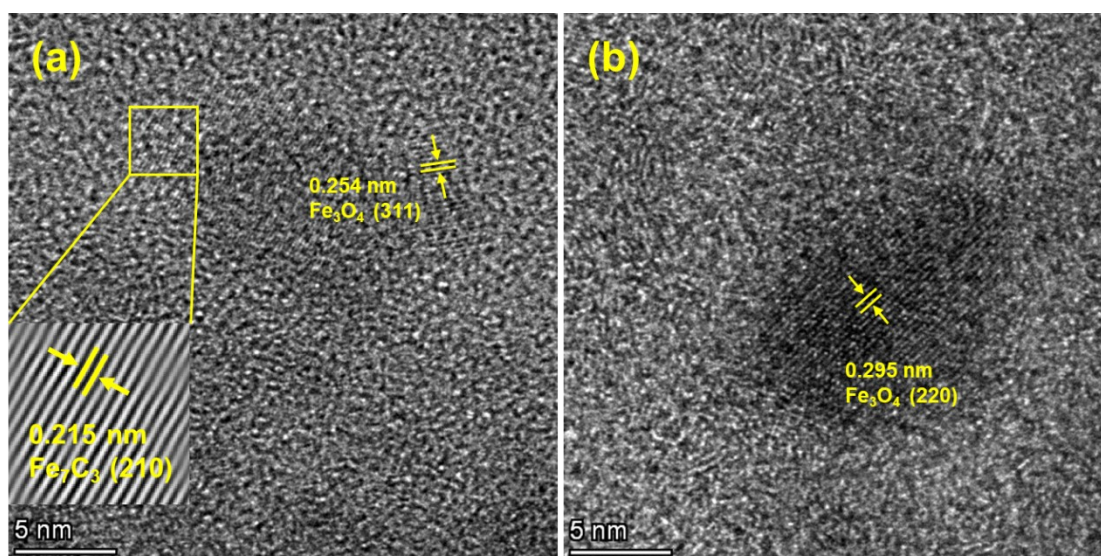

**Figure S1.** TEM images of the fresh (a) Fe/NC-1150 and (b) Fe/AC catalysts.

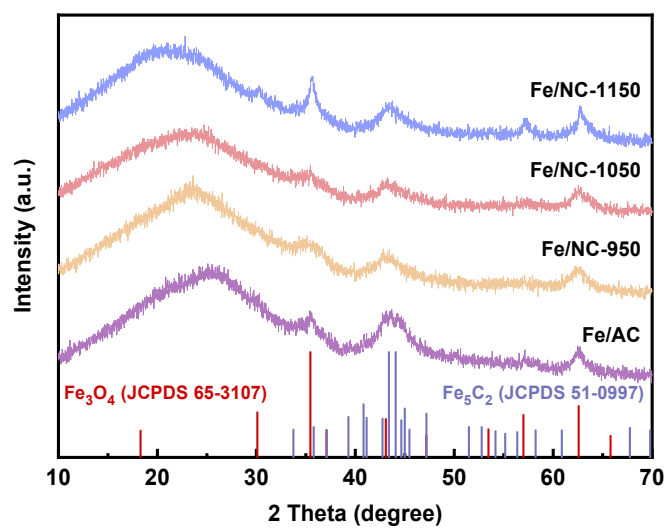

**Figure S2.** XRD patterns of used Fe/AC and Fe/NC-T catalysts.

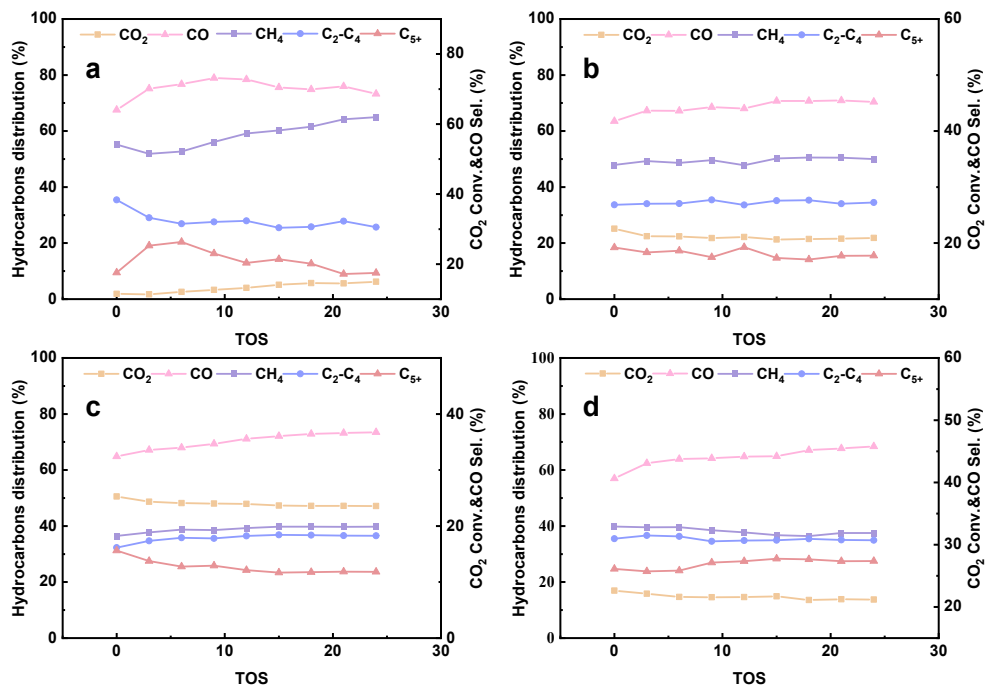

**Figure S3.** Catalytic performance of Fe/AC (a), Fe/NC-950 (b), Fe/NC-1050 (c) and Fe/NC-1150 (d).
